# Supplementary material for: A skill assessment of the biogeochemical model REcoM2 coupled to the Finite Element Sea Ice–Ocean Model (FESOM 1.3)
Source: Copernicus journal article supplement (doi:10.5194/gmd-7-2769-2014), 2014-11-25
Supplement: Supplementary file 2 [file gmd-7-2769-2014-supplement.zip]

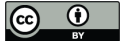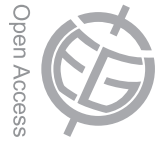

## *Supplement of*

# **A skill assessment of the biogeochemical model REcoM2 coupled to the Finite Element Sea Ice–Ocean Model (FESOM 1.3)**

**V. Schourup-Kristensen et al.**

*Correspondence to:* V. Schourup-Kristensen (vibe.schourup-kristensen@awi.de)

- gmd-7-2769-2014-supplement-cover-letter.pdf
- Supplements\_Schourup
  - .DS\_Store
  - Manual.pdf
  - REcoM2\_atm.F90
  - REcoM2\_ctrl.F90
  - REcoM2\_ini.F90
  - REcoM2\_mod.F90
  - REcoM2\_out.F90
  - REcoM2\_sink.F90
  - REcoM2\_sms.F90
- \_\_MACOSX
  - Supplements\_Schourup
    - \* .\_DS\_Store
    - \* .\_REcoM2\_atm.F90
    - \* .\_REcoM2\_ctrl.F90
    - \* .\_REcoM2\_ini.F90
    - \* .\_REcoM2\_mod.F90
    - \* .\_REcoM2\_out.F90
    - \* .\_REcoM2\_sink.F90
    - \* .\_REcoM2\_sms.F90
